# Supplementary material for: Transition metal coordination frameworks as artificial nanozymes for dopamine detection via peroxidase-like activity
Source: Royal Society of Chemistry journal article supplement (doi:10.1039/d1ma00605c), 2021-01-01
Supplement: d1ma00605c1.pdf [file d1ma00605c1.pdf]

Electronic supplementary information

**Transition metals Coordination Framework an artificial nanozymes for**

**Dopamine detection via peroxidase-like activity**

Marieeswaran Muppidathi and Perumal Panneerselvam\*

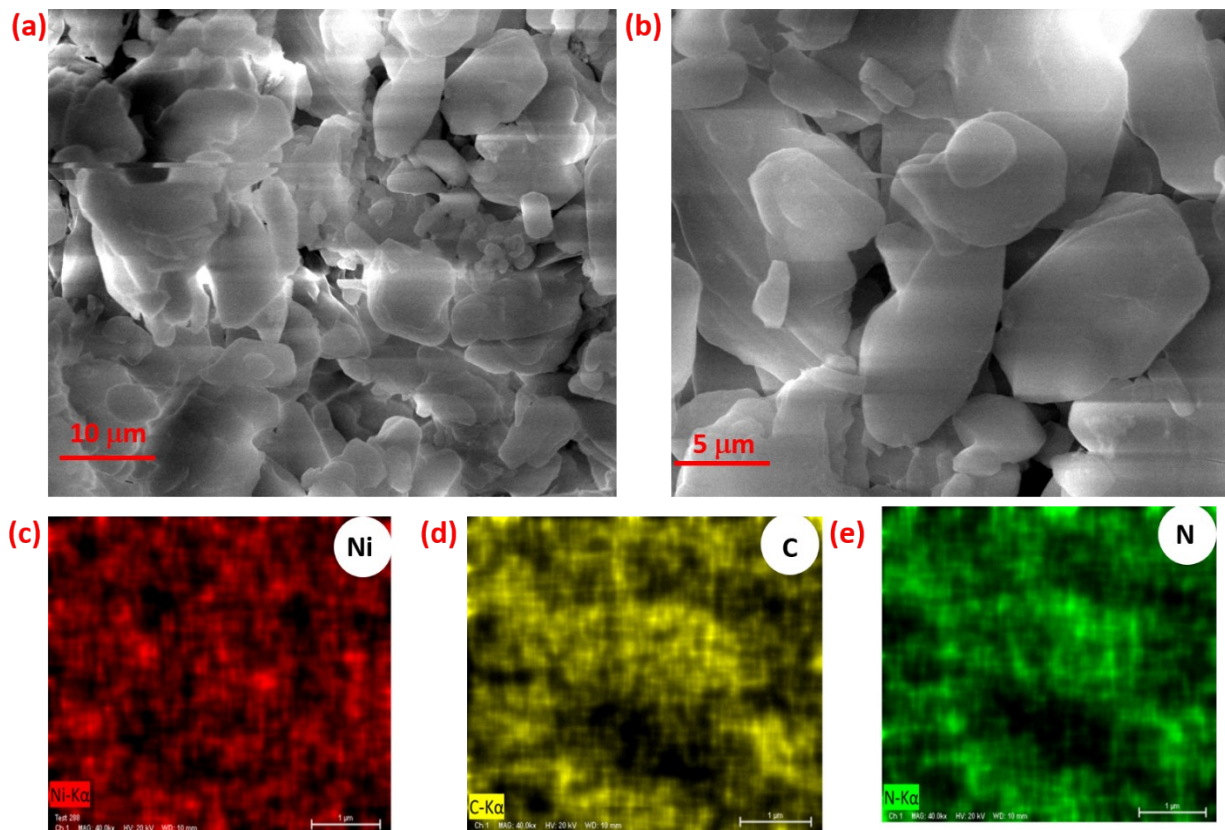

Fig.S1. SEM images of Ni-HMT (a,b), Element mapping for Ni(c), C(d),and N(e).

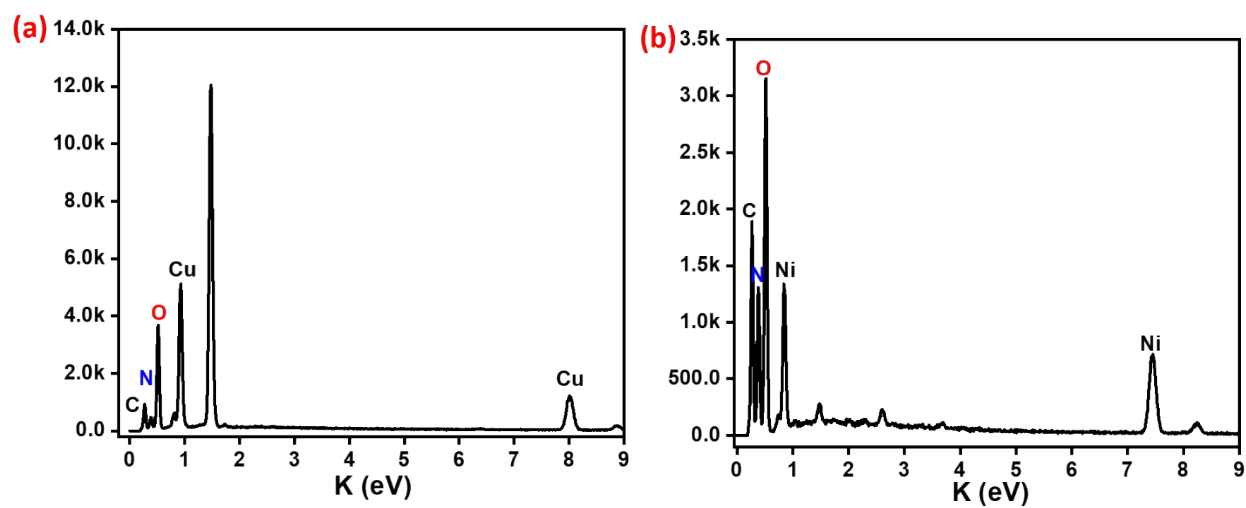

Fig.S2. SEM-EDX of Cu-HMT and Ni-HMT.

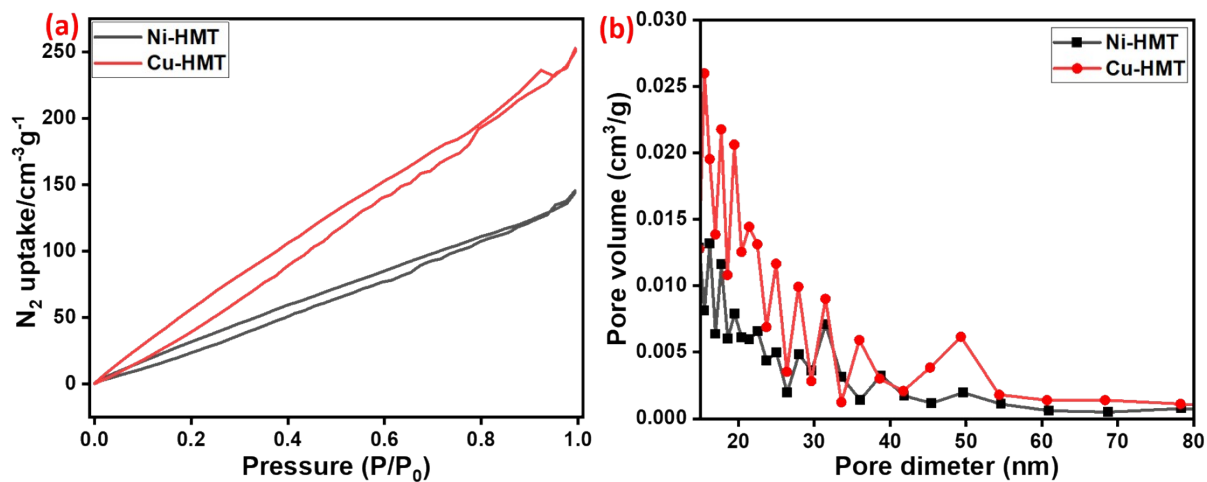

Fig.S3. Nitrogen adsorption and desorption isotherms of Ni-HMT and Cu-HMT.

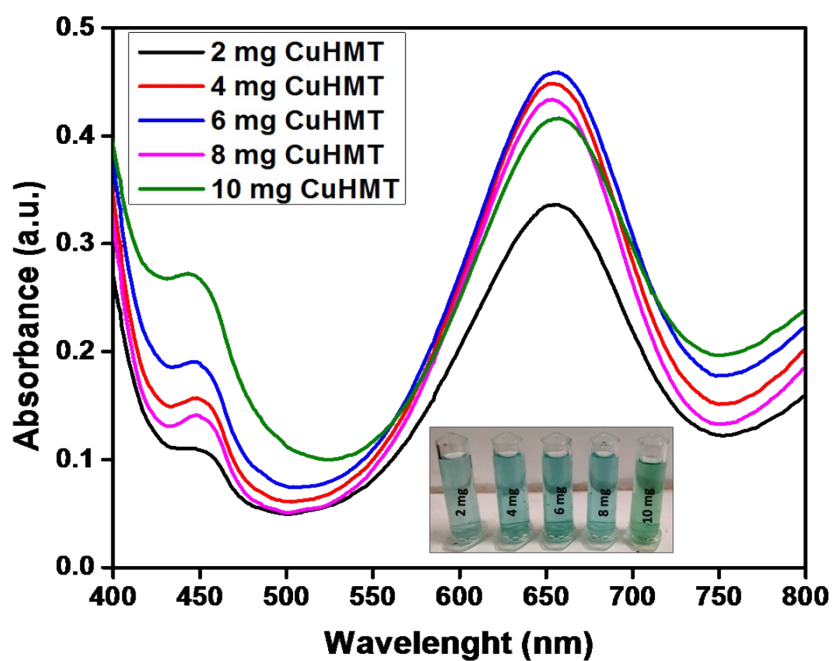

Fig.S4. Absorption spectra of different quantify of 2,4,6,8, and 10mg/ml of Cu-HMT peroxidase mimic activity.

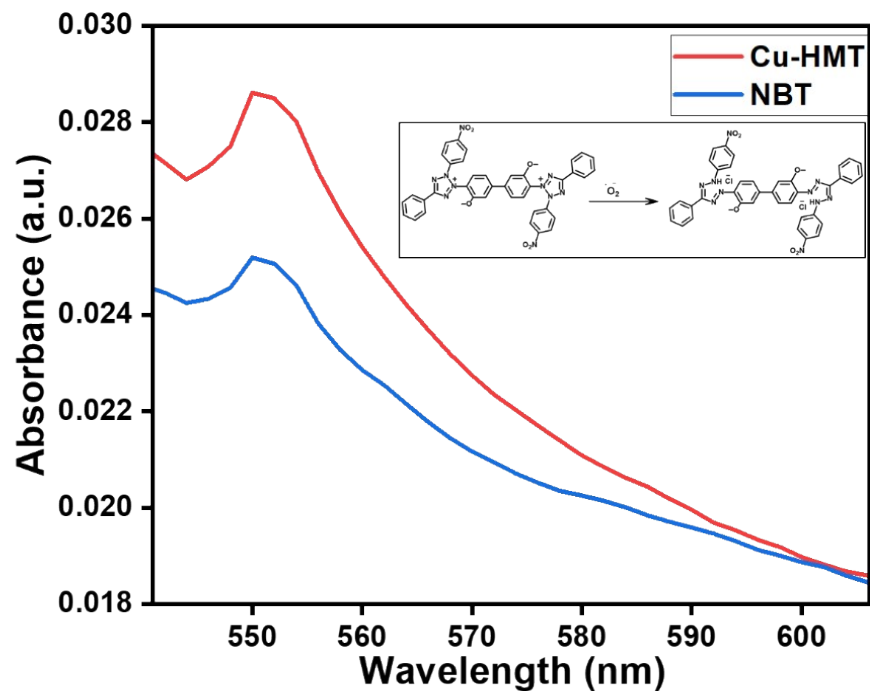

Fig.S4. (a) superoxide analysis of Cu-HMT.

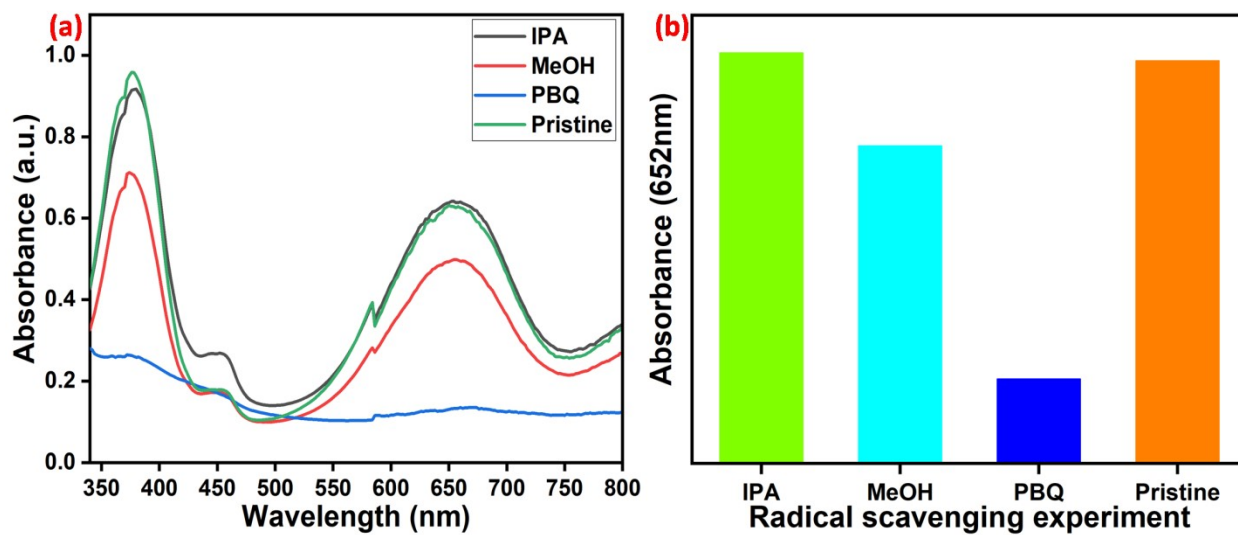

Fig.S6. (a) Absorption spectra of Cu-HMT of peroxidase like activity radical scavenging experiment and (b) bar chart of peroxidase like activity with radical scavenging agent.

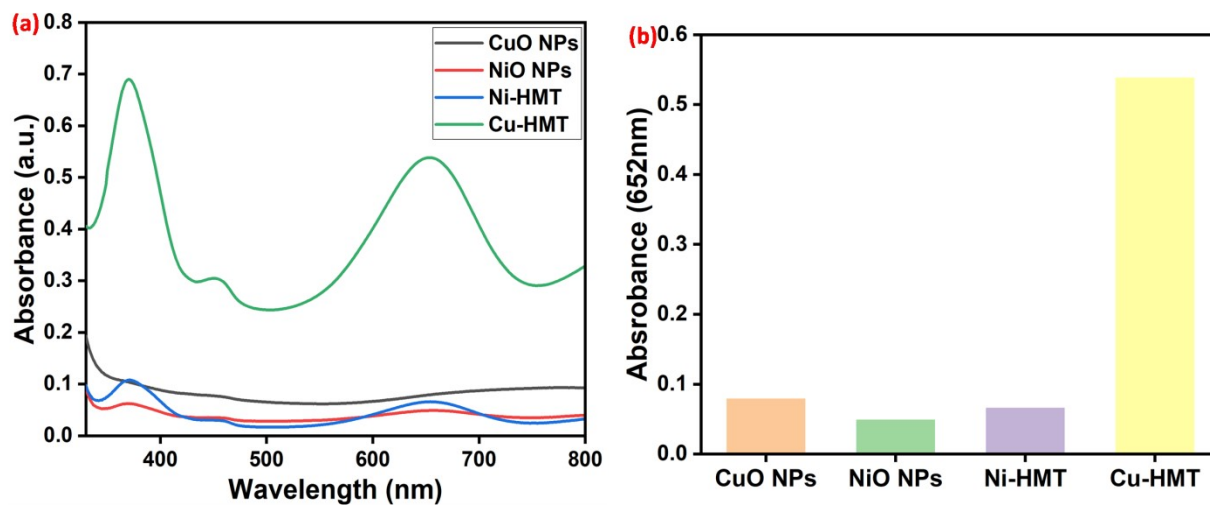

Fig.S7. (a) Absorption spectra of CuONPs, NiO, Ni-HMT and Cu-HMT of peroxidase like activity and (b) bar chart of comparison of peroxidase like activity.
